# Supplementary material
Source: publisher figshare collection journal article supplement (https://acs.figshare.com/ndownloader/files/7979233)
Supplement: Supplementary file 1 [file 7979233]

# Real-time observation of hydrogen peroxide transport through oil phase in a W/O/W double emulsion with chemiluminescence emission

*Hiroshi Kouno, Yosuke Iwai, Yoshiaki Uchida \*, Yuichiro Hirota and Norikazu Nishiyama*

Graduate School of Engineering Science, Osaka University, Toyonaka, Osaka 560-8531, Japan

\*yuchida@cheng.es.osaka-u.ac.jp

## Supporting Information

### Information about movies

**Movie S1** Movement of an internal aqueous droplet in an oil droplet under a bright field microscope. We intentionally moved the internal aqueous droplet to the outer interface and observed the movement of the internal aqueous droplet to the center of the oil droplet.
